# Supplementary material for: Comparative efficacy of lumbar and pelvic support on pain, disability, and motor control in women with postpartum pelvic girdle pain: a three-armed randomized controlled trial
Source: Springer Nature journal article supplement (doi:10.1186/s12891-025-08350-3), 2025-02-01
Supplement: MOESM2 [file 12891_2025_8350_MOESM2_ESM.pdf]

**Please cite the Published Version**

Jafarian, Fahimeh-Sadat, Jafari-Harandi, Mahmonir, Yeowell, Gillian  and Sadeghi-Demneh, Ebrahim (2025) Comparative efficacy of lumbar and pelvic support on pain, disability, and motor control in women with postpartum pelvic girdle pain: a three-armed randomized controlled trial. BMC Musculoskeletal Disorders, 26 (1). 100 ISSN 1471-2474

**DOI:** <https://doi.org/10.1186/s12891-025-08350-3>

**Publisher:** BioMed Central

**Version:** Supplemental Material

**Downloaded from:** <https://e-space.mmu.ac.uk/638255/>

**Usage rights:**  [Creative Commons: Attribution-Noncommercial-No Derivative Works 4.0](https://creativecommons.org/licenses/by-nc-nd/4.0/)

**Additional Information:** This is an open access article which first appeared in BMC Musculoskeletal Disorders

**Data Access Statement:** The datasets used and analysed during the current study are available from the corresponding author (E.S-D) at [sadeghi@rehab.mui.ac.ir](mailto:sadeghi@rehab.mui.ac.ir). upon reasonable request.

**Enquiries:**

If you have questions about this document, contact [openresearch@mmu.ac.uk](mailto:openresearch@mmu.ac.uk). Please include the URL of the record in e-space. If you believe that your, or a third party's rights have been compromised through this document please see our Take Down policy (available from <https://www.mmu.ac.uk/library/using-the-library/policies-and-guidelines>)

The TIDieR (Template for Intervention Description and Replication) Checklist\*:

Information to include when describing an intervention and the location of the information

| Item number | Item                                                                                                                                                                                                                                                                                                                | Where located **                        |                   |
|-------------|---------------------------------------------------------------------------------------------------------------------------------------------------------------------------------------------------------------------------------------------------------------------------------------------------------------------|-----------------------------------------|-------------------|
|             |                                                                                                                                                                                                                                                                                                                     | Primary paper (page or appendix number) | Other † (details) |
| 1.          | <b>BRIEF NAME</b><br>Provide the name or a phrase that describes the intervention.                                                                                                                                                                                                                                  | 8                                       | _____             |
| 2.          | <b>WHY</b><br>Describe any rationale, theory, or goal of the elements essential to the intervention.                                                                                                                                                                                                                | 8                                       | _____             |
| 3.          | <b>WHAT</b><br>Materials: Describe any physical or informational materials used in the intervention, including those provided to participants or used in intervention delivery or in training of intervention providers.<br>Provide information on where the materials can be accessed (e.g. online appendix, URL). | 8                                       | _____             |
| 4.          | Procedures: Describe each of the procedures, activities, and/or processes used in the intervention, including any enabling or support activities.                                                                                                                                                                   | 8                                       | _____             |
| 5.          | <b>WHO PROVIDED</b><br>For each category of intervention provider (e.g. psychologist, nursing assistant), describe their expertise, background and any specific training given.                                                                                                                                     | 8                                       | _____             |
| 6.          | <b>HOW</b><br>Describe the modes of delivery (e.g. face-to-face or by some other mechanism, such as internet or telephone) of the intervention and whether it was provided individually or in a group.                                                                                                              | 8                                       | _____             |
| 7.          | <b>WHERE</b><br>Describe the type(s) of location(s) where the intervention occurred, including any necessary infrastructure or relevant features.                                                                                                                                                                   | 8                                       | _____             |

|      |                                                                                                                                                                                   |     |       |
|------|-----------------------------------------------------------------------------------------------------------------------------------------------------------------------------------|-----|-------|
|      | <b>WHEN and HOW MUCH</b>                                                                                                                                                          |     |       |
| 8.   | Describe the number of times the intervention was delivered and over what period of time including the number of sessions, their schedule, and their duration, intensity or dose. | 8   | _____ |
|      | <b>TAILORING</b>                                                                                                                                                                  |     |       |
| 9.   | If the intervention was planned to be personalised, titrated or adapted, then describe what, why, when, and how.                                                                  | 8   | _____ |
|      | <b>MODIFICATIONS</b>                                                                                                                                                              |     |       |
| 10.† | If the intervention was modified during the course of the study, describe the changes (what, why, when, and how).                                                                 | N/A | _____ |
|      | <b>HOW WELL</b>                                                                                                                                                                   |     |       |
| 11.  | Planned: If intervention adherence or fidelity was assessed, describe how and by whom, and if any strategies were used to maintain or improve fidelity, describe them.            | N/A | _____ |
| 12.‡ | Actual: If intervention adherence or fidelity was assessed, describe the extent to which the intervention was delivered as planned.                                               | N/A | _____ |

\*\* **Authors** - use N/A if an item is not applicable for the intervention being described. **Reviewers** – use ‘?’ if information about the element is not reported/not sufficiently reported.

† If the information is not provided in the primary paper, give details of where this information is available. This may include locations such as a published protocol or other published papers (provide citation details) or a website (provide the URL).

‡ If completing the TIDieR checklist for a protocol, these items are not relevant to the protocol and cannot be described until the study is complete.

\* We strongly recommend using this checklist in conjunction with the TIDieR guide (see *BMJ* 2014;348:g1687) which contains an explanation and elaboration for each item.

\* The focus of TIDieR is on reporting details of the intervention elements (and where relevant, comparison elements) of a study. Other elements and methodological features of studies are covered by other reporting statements and checklists and have not been duplicated as part of the TIDieR checklist. When a **randomised trial** is being reported, the TIDieR checklist should be used in conjunction with the CONSORT statement (see [www.consort-statement.org](http://www.consort-statement.org)) as an extension of **Item 5 of the CONSORT 2010 Statement**. When a **clinical trial protocol** is being reported, the TIDieR checklist should be used in conjunction with the SPIRIT statement as an extension of **Item 11 of the SPIRIT 2013 Statement** (see [www.spirit-statement.org](http://www.spirit-statement.org)). For alternate study designs, TIDieR can be used in conjunction with the appropriate checklist for that study design (see [www.equator-network.org](http://www.equator-network.org)).
